# Supplementary material for: Two-dimensional planar swimming selects for high DNA integrity sperm
Source: Royal Society of Chemistry journal article supplement (doi:10.1039/c9lc00209j), 2019-01-01
Supplement: c9lc00209j2.pdf [file c9lc00209j2.pdf]

## Electronic Supplementary Information

### Two-Dimensional Planar Swimming Selects for High DNA Integrity Sperm

Jason Riordon,<sup>a§</sup> Farhang Tarlan,<sup>a§</sup> Jae Bem You,<sup>a§</sup> Biao Zhang,<sup>a,b</sup> Percival J. Graham,<sup>a</sup> Tian Kong,<sup>a</sup> Yihe Wang,<sup>a</sup> Alexander Lagunov,<sup>c</sup> Thomas Hannam,<sup>c</sup> Keith Jarvi,<sup>d</sup> David Sinton<sup>a,\*</sup>

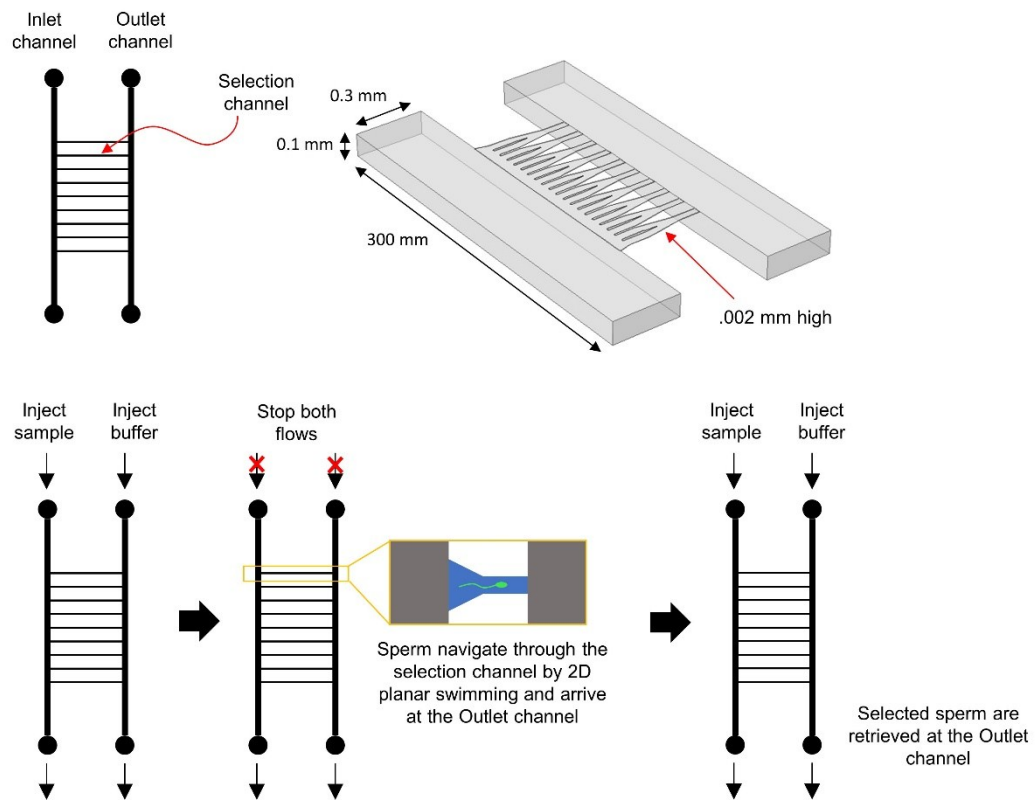

**Fig. S1** Schematic demonstrating loading, selection and collection in the device.

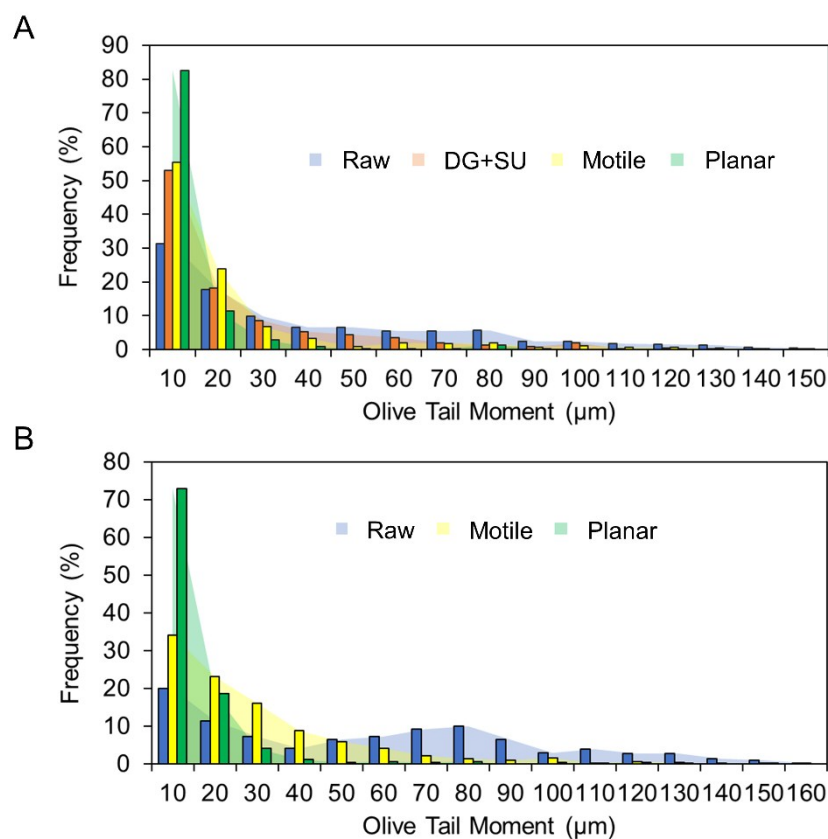

**Fig. S2** Average olive tail moment distribution of donor and clinical patient semen samples. A) In donor samples 28% of raw sperm showed  $< 10 \mu\text{m}$  olive tail moment, while this ratio increased to 50% for the motile sperm and to 99% for the planar swimming sperm. B) In patient samples, 30% of the raw sperm exhibited  $< 10 \mu\text{m}$  olive tail moment. This ratio increased to 64% for the motile sperm and 98% for the planar swimming sperm.

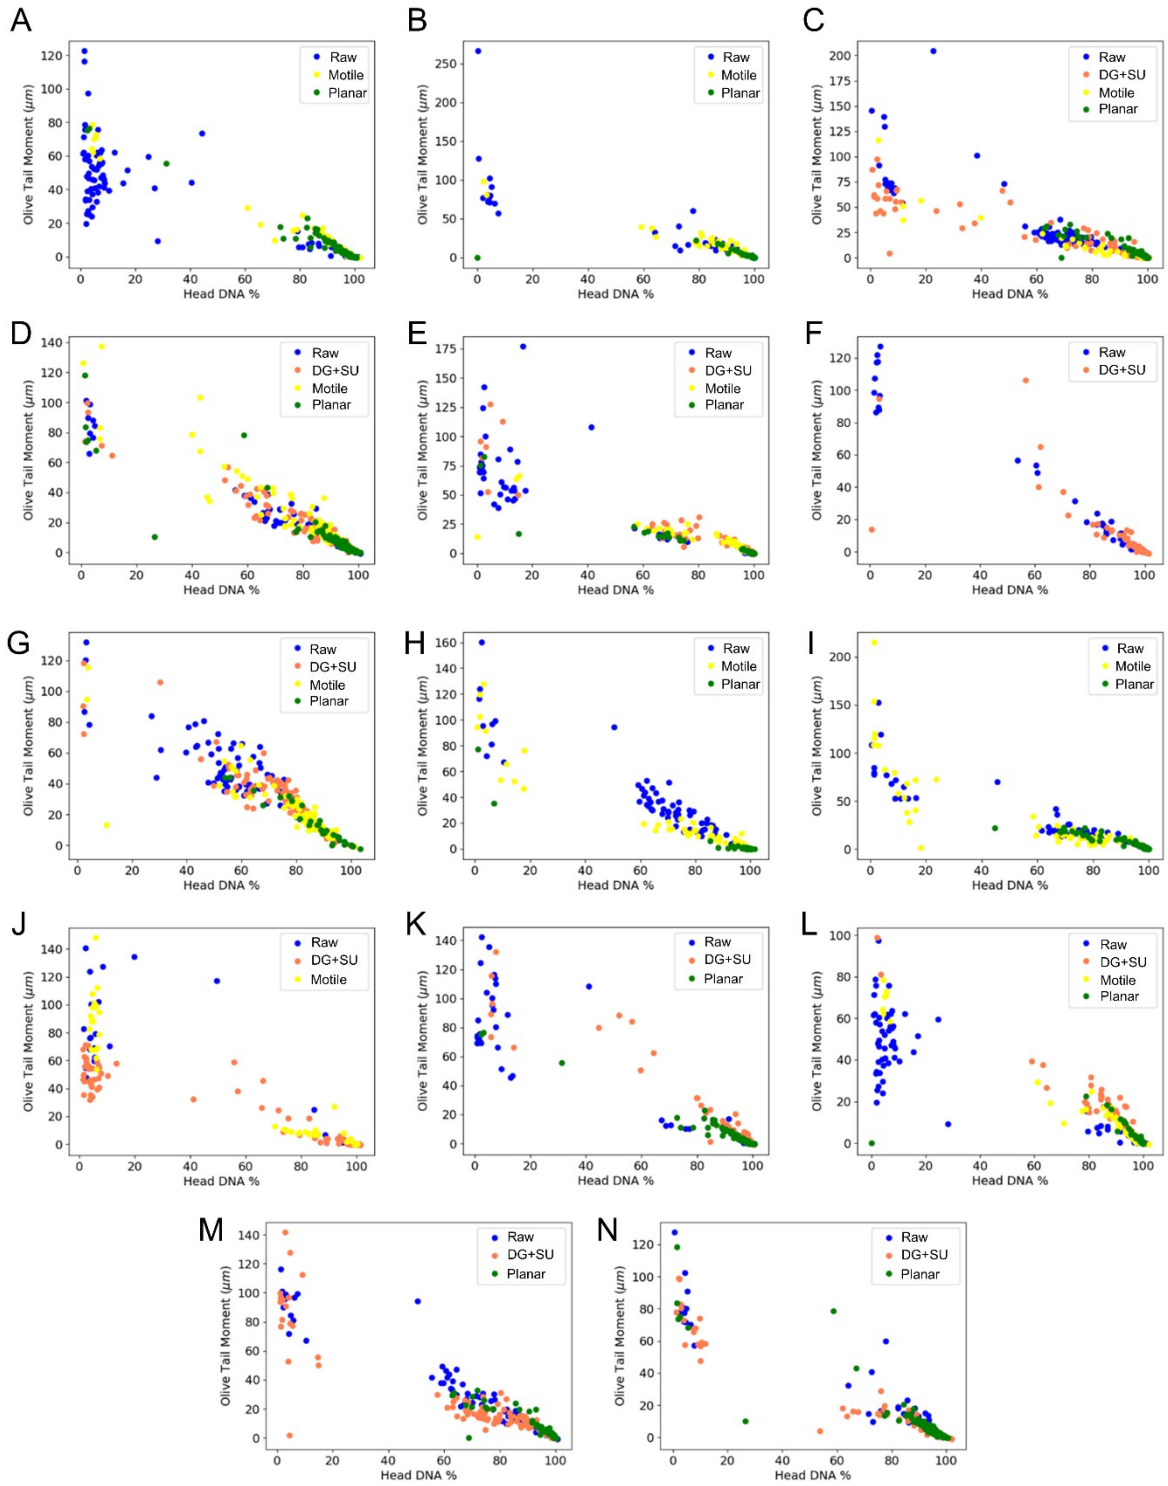

**Fig. S3** Head DNA % and olive tail moment scatter plot of each donor semen sample following single-cell gel electrophoresis.

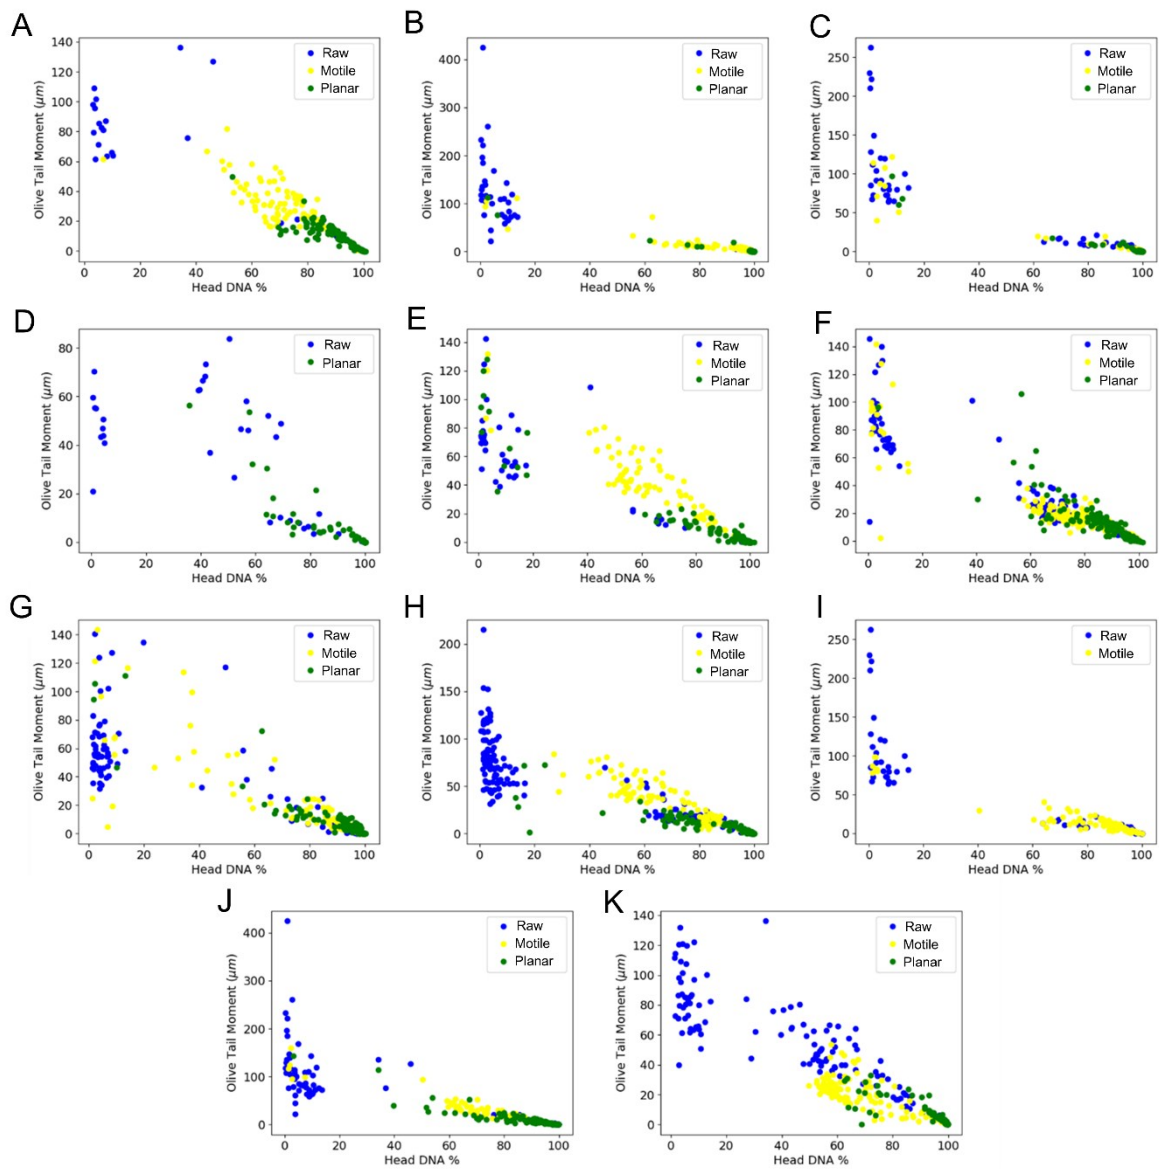

**Fig. S4** Head DNA % and olive tail moment scatter plots of each patient semen sample following single-cell gel electrophoresis.

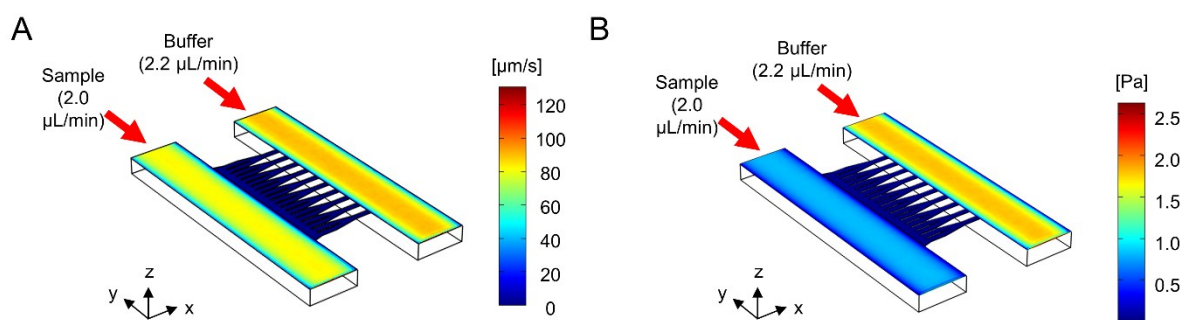

**Fig. S5** Numerical simulation of velocity distribution (A) and shear stress distribution (B) in the device during loading and collection processes, within a plane that crosses the selection channels at mid-height.

**Table S1.** Detailed comet measurements for both donor and patient samples. Values are presented as average  $\pm$  S.D.

|                           | Donor                            |                                 |                                   | Patient                         |                                  |                                    |
|---------------------------|----------------------------------|---------------------------------|-----------------------------------|---------------------------------|----------------------------------|------------------------------------|
|                           | Head DNA<br>(%)                  | OTM<br>( $\mu$ m)               | Tail Moment<br>( $\mu$ m)         | Head DNA<br>(%)                 | OTM<br>( $\mu$ m)                | Tail Moment<br>( $\mu$ m)          |
| <b>Raw<br/>(range)</b>    | 59.5 $\pm$ 10.0<br>(40.5 – 77.5) | 35.8 $\pm$ 6.9<br>(20.5 – 46.2) | 72.8 $\pm$ 19.1<br>(35.5 – 118.8) | 40.8 $\pm$ 7.5<br>(24.9 – 49.1) | 58.0 $\pm$ 18.8<br>(34.6 – 99.6) | 122.1 $\pm$ 31.2<br>(72.0 – 186.0) |
| <b>DG+SU<br/>(range)</b>  | 79.7 $\pm$ 5.5<br>(69.1 – 87.6)  | 18.1 $\pm$ 5.1<br>(13.0 – 31.3) | 29.8 $\pm$ 11.5<br>(14.5 – 52.1)  | Data not available              |                                  |                                    |
| <b>Motile<br/>(range)</b> | 81.1 $\pm$ 5.0<br>(70.0 – 87.7)  | 16.5 $\pm$ 4.9<br>(9.9 – 23.8)  | 28.6 $\pm$ 12.7<br>(11.3 – 49.1)  | 73.2 $\pm$ 6.5<br>(62.2 – 82.7) | 25.4 $\pm$ 9.6<br>(15.2 – 43.0)  | 47.4 $\pm$ 18.5<br>(26.3 – 82.0)   |
| <b>Planar<br/>(range)</b> | 92.5 $\pm$ 2.5<br>(90.0 – 97.5)  | 6.5 $\pm$ 2.7<br>(2.0 – 10.2)   | 7.7 $\pm$ 3.3<br>(1.8 – 11.2)     | 90.4 $\pm$ 2.3<br>(87.5 – 95.3) | 7.8 $\pm$ 2.2<br>(4.3 – 11.0)    | 11.1 $\pm$ 2.6<br>(8.7 – 18.0)     |

**Table S2.** Sperm concentration and motile concentration of the anonymized donor semen samples used in this study

| <b>Donor #</b> | <b>Sperm concentration<br/>(<math>10^6 \times \text{mL}^{-1}</math>)</b> | <b>Motile concentration<br/>(<math>10^6 \times \text{mL}^{-1}</math>)</b> |
|----------------|--------------------------------------------------------------------------|---------------------------------------------------------------------------|
| 1              | 75                                                                       | 25                                                                        |
| 2              | 72                                                                       | 26                                                                        |
| 3              | 104                                                                      | 31                                                                        |
| 4              | 58                                                                       | 16                                                                        |
| 5              | 68                                                                       | 20                                                                        |
| 6              | 74                                                                       | 21                                                                        |
| 7              | 116                                                                      | 45                                                                        |
| 8              | 105                                                                      | 37                                                                        |
| 9              | 111                                                                      | 40                                                                        |
| 10             | 114                                                                      | 55                                                                        |
| 11             | 118                                                                      | 61                                                                        |
| 12             | 94                                                                       | 52                                                                        |
| 13             | 97                                                                       | 36                                                                        |
| 14             | 95                                                                       | 42                                                                        |
| 15             | 51                                                                       | 32                                                                        |
| 16             | 166                                                                      | 91                                                                        |



**Table S3.** Sperm concentration and motile concentration of the anonymized patient semen samples used in this study

| <b>Patient #</b> | <b>Sperm concentration<br/>(<math>10^6 \times \text{mL}^{-1}</math>)</b> | <b>Motile concentration<br/>(<math>10^6 \times \text{mL}^{-1}</math>)</b> |
|------------------|--------------------------------------------------------------------------|---------------------------------------------------------------------------|
| 1                | 45                                                                       | 19                                                                        |
| 2                | 72                                                                       | 25                                                                        |
| 3                | 101                                                                      | 31                                                                        |
| 4                | 69                                                                       | 29                                                                        |
| 5                | 74                                                                       | 23                                                                        |
| 6                | 85                                                                       | 26                                                                        |
| 7                | 55                                                                       | 35                                                                        |
| 8                | 112                                                                      | 54                                                                        |
| 9                | 91                                                                       | 12                                                                        |
| 10               | 63                                                                       | 16                                                                        |
| 11               | 58                                                                       | 11                                                                        |

**Movie S1** Planar swimming sperm selection process. Sperm must employ a planar swimming mode through the selection channel to reach the outlet channel (right). Once in the selection channel, geometrical confinement mandates planar swimming. The movie is sped up 5x.
